# Supplementary material
Source: Springer Nature journal article supplement (https://www.springermedizin.de/resource/supplementary/12916_2010_356_MOESM5_ESM.pdf/9599924)

□ undefined    ■ mild    ■ moderate    ■ moderately severe    ■ severe    ■ very severe

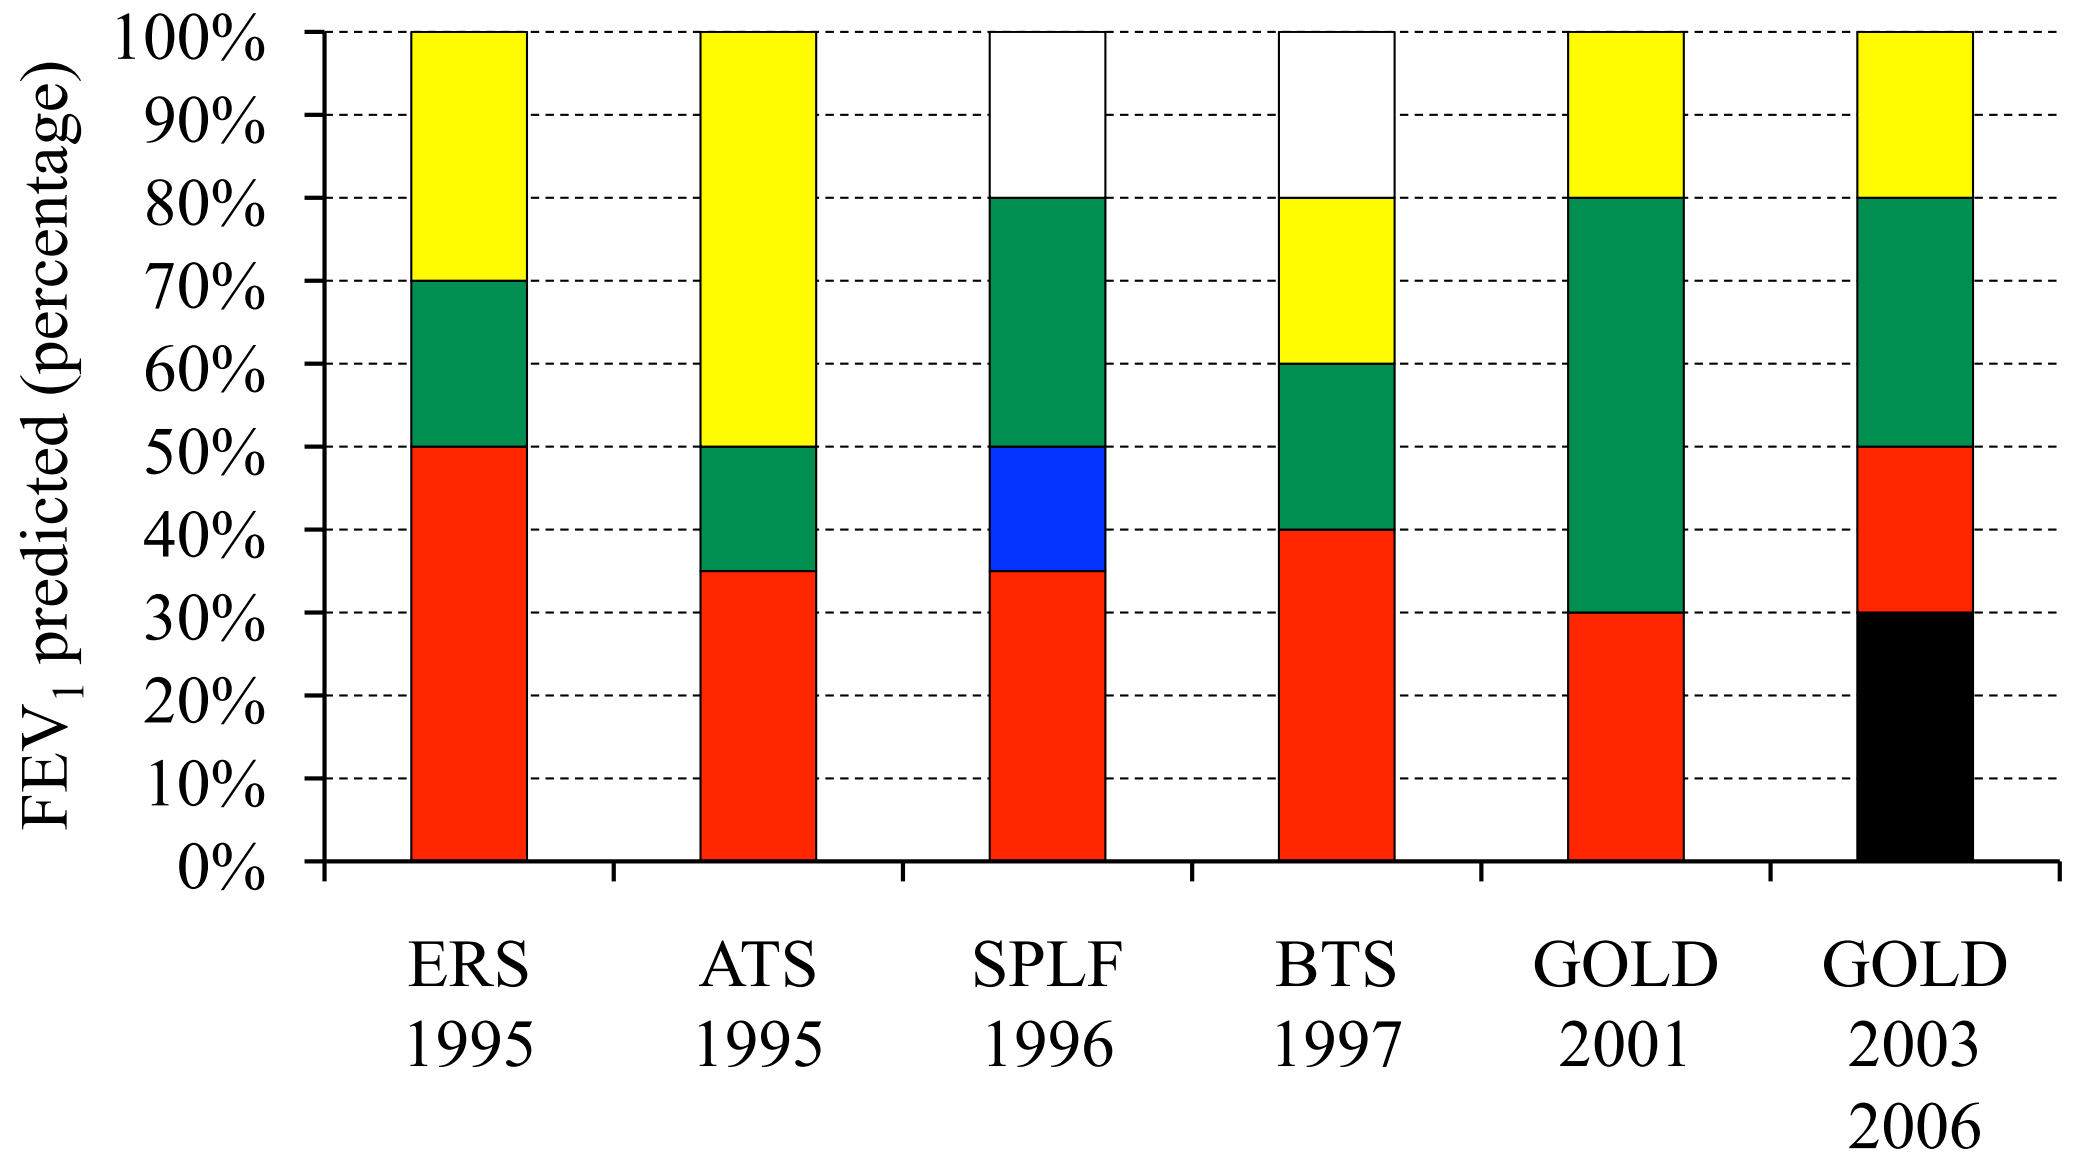

Supplement: MOESM5 [file 9599924]
